# Supplementary figures and images for: Molecular targeting of NOX4 for neuropathic pain after traumatic injury of the spinal cord
Source: PubMed Central journal article supplement — Cell Death Dis. 2012 Nov 15;3(11):e426–. doi: 10.1038/cddis.2012.168 (PMC3542604; doi:10.1038/cddis.2012.168), 2012-11-15

Supplementary Fig. S1.

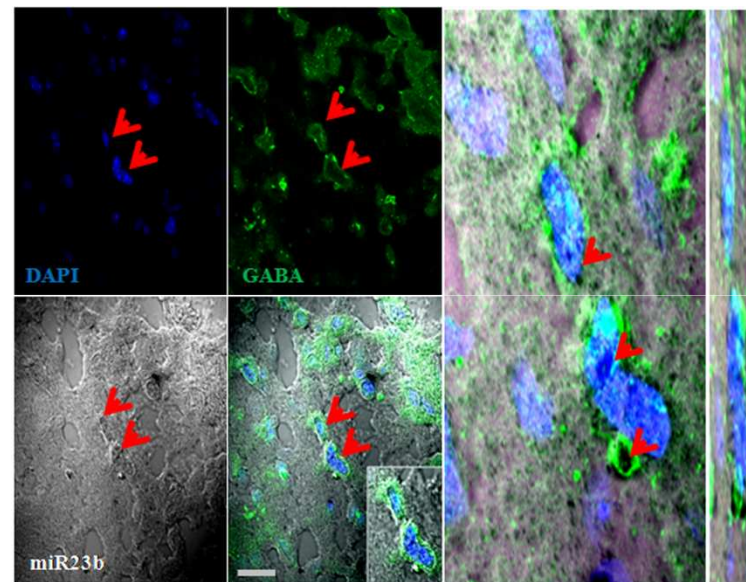

Supplementary Fig. S2.

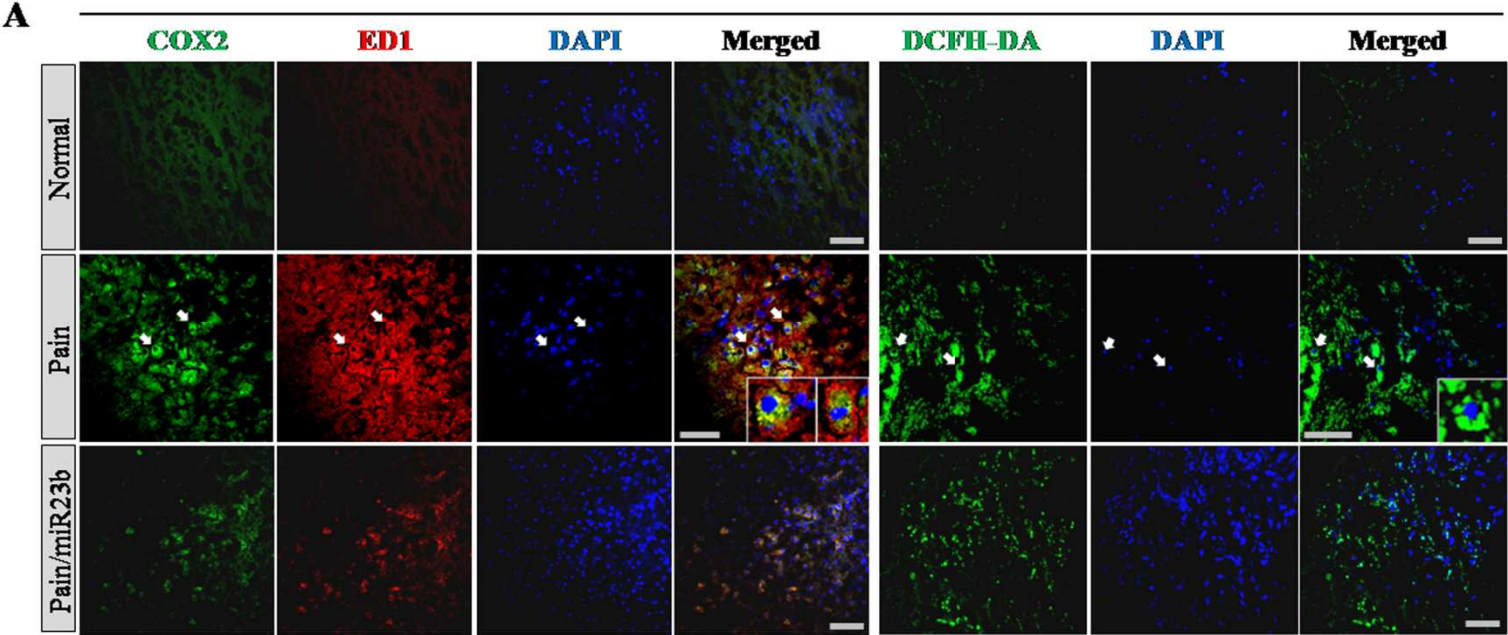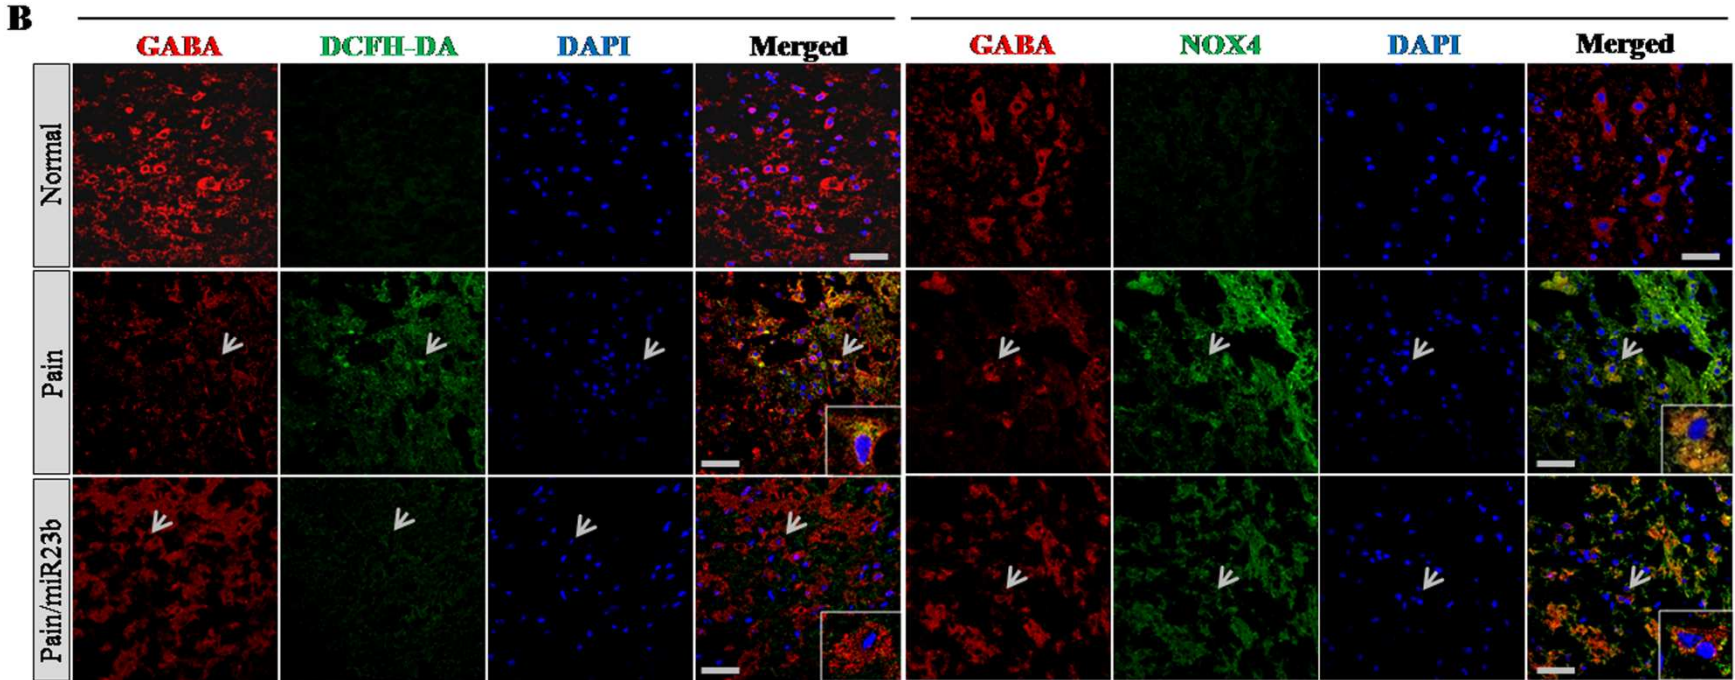

Supplementary Fig. S3.

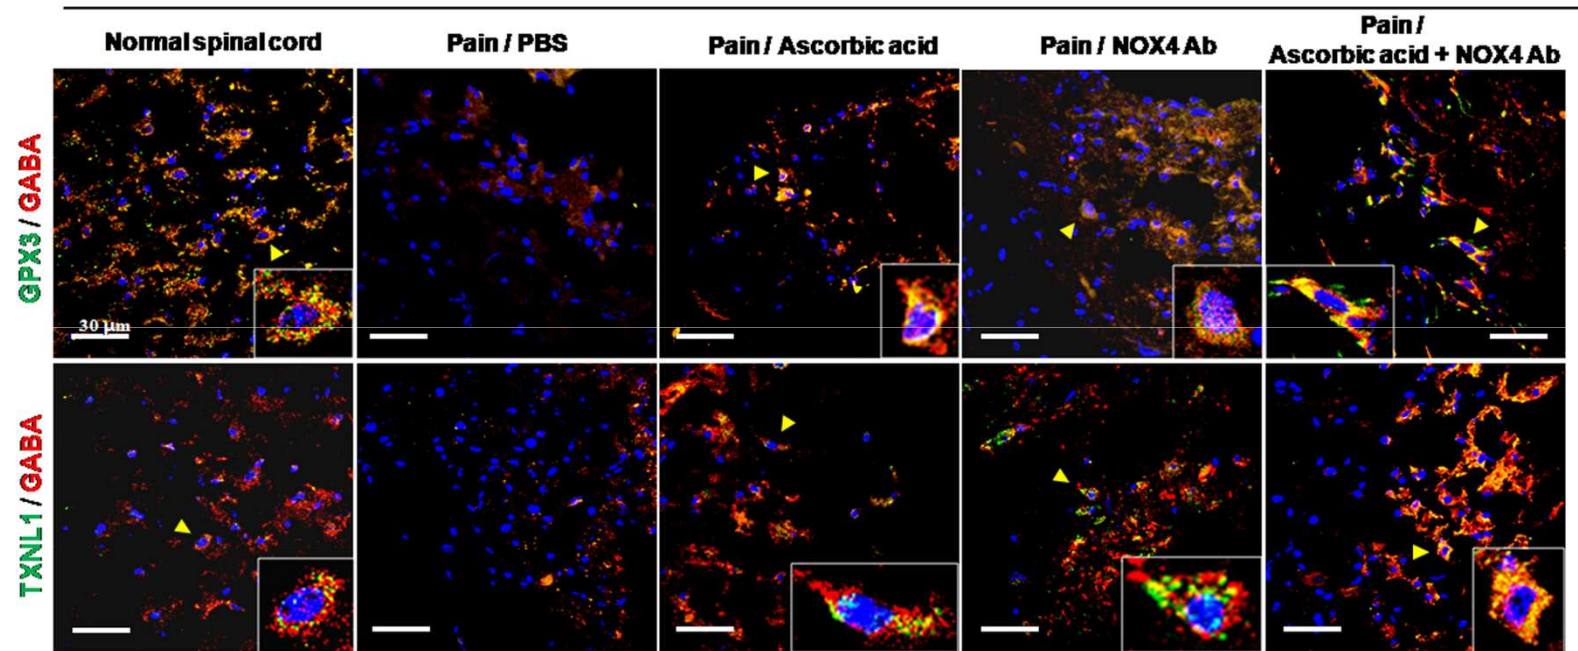

Supplement: cddis2012168x1.pdf [file cddis2012168x1.pdf]
